# Supplementary material
Source: PubMed Central journal article supplement (PMC5341000)

**A**

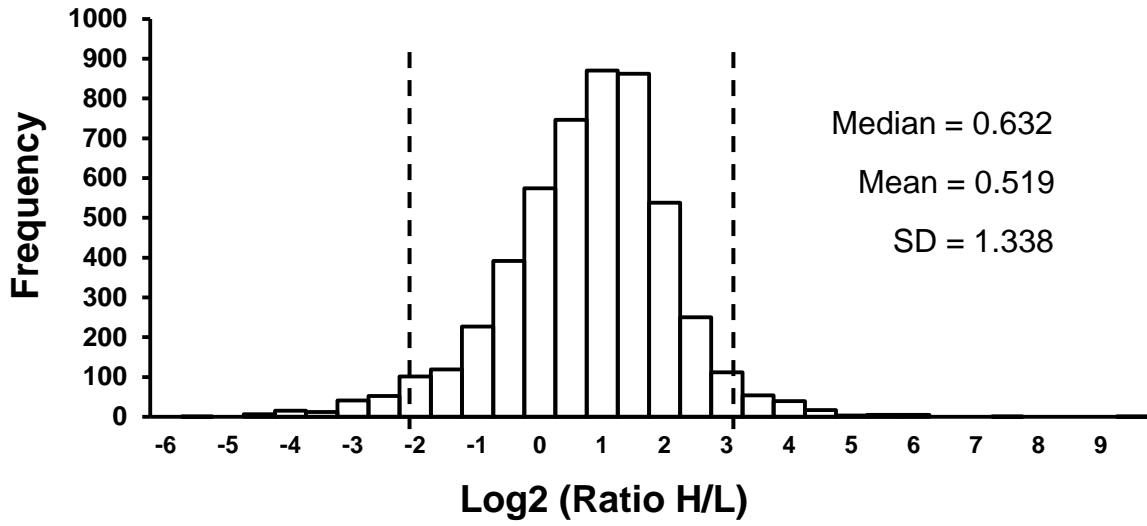

**B**

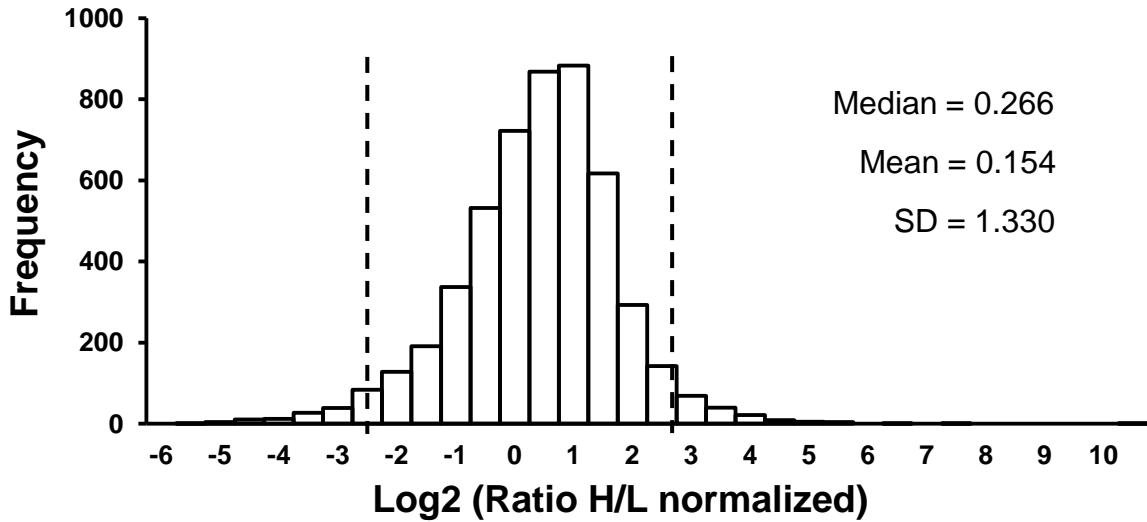

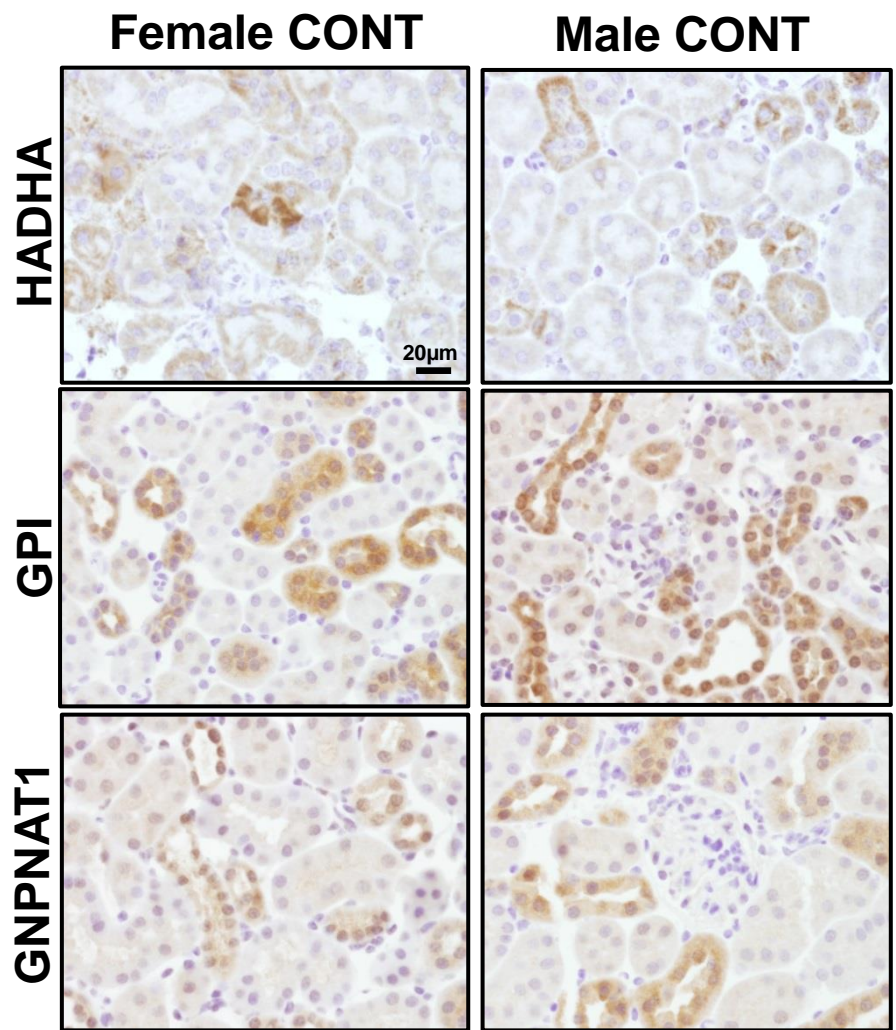

Supplement: 10.1074_M116.061903_mcp.M116.061903-8.pdf [file 10.1074_M116.061903_mcp.M116.061903-8.pdf]
